# Supplementary material for: Numerical simulations of windblown dust over complex terrain: the Fiambalá Basin episode in June 2015
Source: Copernicus journal article supplement (doi:10.5194/acp-17-6759-2017), 2017-06-09
Supplement: Supplementary file [file acp-17-6759-2017-supplement-title-page.pdf › acp-17-6759-2017-supplement-title-page.pdf]

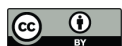

*Supplement of*

## **Numerical simulations of windblown dust over complex terrain: the Fiambalá Basin episode in June 2015**

**L. A. Mingari et al.**

*Correspondence to:* Leonardo A. Mingari (lmingari@gmail.com)

- [acp-17-6759-2017-supplement-title-page.pdf](#)
- [water\\_vapor.gif](#)

The copyright of individual parts of the supplement might differ from the CC BY 3.0 License.
